# Supplementary material
Source: publisher figshare collection journal article supplement (https://tandf.figshare.com/articles/dataset/_/5110699)
Supplement: Supplementary file 2 [file 3]

### Appendix 3. Martin's unpublished manuscript on the Calopterygines

René Martin (1846-1925) wrote a Monograph of the 'Famille des Calopterygidae' in French and submitted this manuscript in 1912 to the series 'Collections Zoologiques du Baron Edm. de Selys Longchamps – Catalogue Systématique et Descriptif', but it remained unpublished. The manuscript was left in Brussels in 1920 when Martin moved to Chili (Calvert, 1927). It had been considered lost but was found in October 2013 in the archives of Elwood Montgomery at the University of Florida (Hämäläinen, 2015). Montgomery had received the manuscript on loan from RBINS during his visit to Brussels in 1964 and it remained unreturned. The original handwritten manuscript contains drawings of appendages by E.C. Menger but lacks colour plates (personal communication, Hämäläinen, 5 November 2013). Recently it was digitalised by Rosser Garrison and the original manuscript will be returned to the archives of the Royal Belgian Institute for Natural Sciences in Brussels.

In three cases this manuscript provides information that has been used to associate Selys' names with current species names. *Micromerus annulatus* (Ca132b) was associated with *Pachycypha aurea* Lieftinck, 1950 (Figure 1; personal communication, Hämäläinen, 29 November 2015), *Hetaerina atriguttata* (Ca68a) with *Hetaerina fuscoguttata* Selys, 1878 (Figure 2) and *Euphaea carissima* (Ca88b) with *Euphaea splendens* Hagen in Selys, 1853 (Figure 3 a and 3b). For more details on these associations, see Appendix 2.

*Micromerus annuligaster* (~~delays~~) nov. spec.

♀ long. total 16<sup>m</sup> abd. 10<sup>m</sup> aile inf. 12<sup>m</sup>

♀ Face brun jaunâtre, épistome noir luisant dessus, jaune en dessous; dessus de la tête noir avec deux gros points jaunes sur le front, trois autres points autour des yeux et quatre petits points sur derrière, ainsi que des lignes le long de chaque œil, jaunes. Prothorax noir, bords de jaune et marbre de jaunâtre en dessous. Elytres brun noirâtre avec une ligne antérieure peu apparente, un trait ligne humérale, le côté bas avec des taches d'un gris noir.

Abdomen à fond jaune clair: le 1<sup>er</sup> segment brun, le 2<sup>e</sup> avec un anneau brun clair sur le deux tiers terminaux, les 3-8<sup>es</sup> avec un anneau brun clair sur le tiers terminal; les 9-10<sup>es</sup> jaunes.

Appendices bruns, plus longs que le 10<sup>e</sup> segment, moins longs que le 9<sup>e</sup>, en fines aiguilles.

Pieds avec les femurs brun jaune marbre de noir, les tibia bruns.

Aile fortement safranée, sauf le dernier quart de quatre qui est hyalin. Stigme brun, plus jaune extérieurement. 6 antécubites aux supérieurs.

Coll. delays: 1 ♀ unique, type  
Hab. Bornéo (Sintang)

Figure 1. Page 245 on *Micromerus annuligaster* in Martin's manuscript.

5. *Hetaerina fuscoguttata* Selys.*H. fuscoguttata* Selys. *Cois. Ind. Soc. ent. Belg.* 1878. 1879.

abd. ♂ 42-43- ♀ 34- aile inf. ♂ 29-30- ♀ 28-

♂ Lèvre supérieure noire, rhinarium jaune, dessus de la tête noir, dessus du thorax noir à reflet, plus ou moins cuivres, les cts bruns avec trois raies jaunes bien marquées. Abdomen marron noirâtre, avec marques jaunes peu visibles au cts de 2-3 segments. Pieds brun foncé. Appendices supérieurs noirs, à peine plus longs que le 10<sup>e</sup> segment, leur dilatation médiane <sup>fort petite</sup> inférieurs <sup>plus courts</sup>, plus courts, subconiques.

Ailes étroites; tache basale rouge de supérieures petite, n'existent que dans l'espace postcostal, s'arrêtent à bout du quadrilatère et ne touchent pas tout-à-fait le bord postérieur. Celles de inférieures nulle, indiquent seulement par un réseau rouge. La pointe extrême de quatre avec une goutte d'un brun noirâtre associée à bord. Ps. destigma. 26-34 anténodals au supérieures.

♀ Ailes étroites, hyalines; réticulation basale ou rouge pâle ou grise. Colorée comme le mâle, avec des lignes jaunes le long des yeux, une humérale jaune, large; l'abdomen brun foncé ou gris brun. Ps. destigma.

Bysses: coll. Selys, en nombre.

Hab. Panama, Costarica.

Forme *atrigruttata* nov. subsp.

abd. ♂ 39-40. ♀ 30- aile inf. ♂ 28- ♀ 27-

♂ Le mâle diffère de *fuscoguttata* par la coloration du corps plus cuivreuse, le dessus du thorax violet avec une ligne dorsale noire, longues humérales jaunes et la raie jaune au cts, l'abdomen noir violet. Les appendices supérieurs sont noirs, assez éparpillés à la base, puis s'allongent jusqu'à recouvrir ou au moins de ténuer inférieurs, puis brièvement fins et recouverts l'un vers l'autre, les inférieurs droits, le milieu.

♀ jeune: Face jaune cuivres, épistoma foncé, tout le corps d'un brun marron clair, avec sur le thorax une dorsale et des antéhumérales jaunes, l'abdomen avec une raie dorsale jaune, les pieds brun clair. Ailes d'un jaune rougâtre de la base au bord, à qui tient à la réticulation. 31 anténodals au supérieures. Le mâle en a de 25 à 34 au supérieures, avec 32-33 postnodals.

Bysses: ♂ &amp; coll. Selys.

Hab. Panama. *atrigruttata*.Figure 2. Page 82 on *Hetaerina atrigruttata* in Martin's manuscript.



par une nervule, exceptionnellement deux ou plusieurs.  
 ♀ Corps comme le mâle. Ailes étroites, hyalines, moyen laves de  
 jaunâtre, surtout à la base et en haut. Stigme brun ou marron, <sup>très long</sup> ~~très long~~  
 appendice moyen, tr. mince. Les huméraux sont généralement beaucoup  
 plus épaissies que celle de mâles, et l'abdomen plus court.  
 Corps: Muséum de Halle, de Leyde, et coll. Selys & coll. Selys et R. Martin  
 Coll. Selys 351 ♀  
 Hab. Sumatra, Java, Malacca.

3°: *Euphaea splendens* Selys.

*E. splendens* Selys. Synops. Calypt. 1853.

abd. 37.42 ~ ♀ 38 ~ aile inf. 30.38 ~

♂ tête noire entièrement. Corps noir, parfois avec vestiges consensuels aux  
 côtés du thorax; abdomen d'un noir marron. Pieds noirs, tibiai plutôt marron  
 à dehors.

appendice supérieur noir, mince, à la base, aussitôt après en forme de grosse  
 massue allongée, sans apparence de tumeur inférieure, les inférieurs, noirs, minces,  
 excessivement courts.

Ailes larges, les supérieures avec le 5<sup>e</sup> basal hyalin, la rive noirâtre  
 chatoyante, le bout après le stigme plus clair; les inférieures plus dilatées  
 avec l'extrême base brune, le bout subitement noir mat, mais toute l'aile  
 entre les deux teintes avec de magnifiques reflets verts et violets. Environ  
 30 antinodaux et 40-45 postnodaux. Stigme assez long, brun ou noir.  
 Quadrilatère moyen ou étroit, court, avec une nervule, exceptionnellement deux,  
 ou libre. Corps noir: la tête du haut, du dessous, des côtés, tout le thorax, des côtés, au bout du thorax, de l'abdomen  
 et des latéraux, et thorax, jaunes, jaunes, des côtés et vers l'abdomen.

♀ Ailes supérieures jaunâtres en haut, les inférieures brunâtres en haut  
 et non dilatées. Quadrilatère, des côtés jaunes à la tête, au thorax, et au thorax.

Cypris: Muséum de Vienne et coll. Selys.

Coll. Selys: 272 ♀

Hab. Ceylan.

Figure 3a. Page 129 on *Euphaea carissima* in Martin's manuscript.

*E. carissima* Kirby.  
 Forme *carissima* Kirby. Odon. of Ceylon 1893.

abd. 33-35<sup>-</sup> aile inf. 24-25<sup>-</sup>

♂ Je ne vois, en dehors de la taille, aucune différence avec le type. Un exemplaire a les ailes supérieures, l'extrémité des inférieures, et leur espace costal jusqu'au nodus avec des reflets vert brillant.

♀ Br. petite. Corps brun, thorax noir avec deux minces antehumérales jaunes et les côtes lignes de jaune; la tête noire avec quelques taches et points jaunes; abdomen noir, court. Ailes hyalines, tachées de brun en haut, le long de la costale, sous la sous-costale, et sans autour.

type: British Museum

Coll. Selys 3 ♂ 1 ♀

Hab. Ceylon.

4<sup>e</sup> *Euphaea refulgens* Selys.

*E. refulgens* Selys. Synops. Calopt. 1853.

Abd. 36<sup>-</sup> ♀ 27-28<sup>-</sup> aile inf. 29<sup>-</sup> 33<sup>-</sup>

♂ Tête noire entièrement. Corps noir, abdomen plutôt marron sur les premiers segments avec apparence d'une très mince ligne dorsale jaune sur ces segments; pieds noirs.

Appendices supérieurs un peu plus longs que le 10<sup>e</sup> segment; <sup>très</sup> dilatés inférieurement jusqu'en l'apex du lobule qui forme un petit crochet comme en bas et en dedans; les inférieurs très courts, coniques, minces, presqu'indistincts.

Ailes larges, les supérieures avec l'extrême base et parfois un espace basal tout le long de la costale hyaline, le rest brun avec des reflets verts et bleus jusqu'après le nodus, dans tout le milieu de l'aile, le bout assez largement hyalin un peu bruni; les inférieures scabellées avec seulement l'extrême bout hyalin sous le stigme. Environ 34 antinodales et 36-38 postnodales. Stigme assez long, brun ou noir. Quadrilatère étroit, court, avec 1 nervelle, rarement 2.

♀ ailes moins larges, même assez étroites, les supérieures uniformément d'un beau brun clair finissant en ligne droite 4 à 6 alules après le nodus,

Figure 3b. Page 130 on *Euphaea carissima* in Martin's manuscript.
